# Supplementary material for: Novel R2R3-MYB Transcription Factor LiMYB75 Enhances Leaf Callus Regeneration Efficiency in Lagerstroemia indica
Source: MDPI journal article supplement (doi:10.3390/f14030517), 2023-03-06
Supplement: s1 [file s1]

**Supplementary Table S1** Composition of medium tested for callus induction from leaf explants of *Lagerstroemia indica*

| Callus induction medium | Components   |                |               |               | Callus introduction rate (%) |
|-------------------------|--------------|----------------|---------------|---------------|------------------------------|
|                         | Basic medium | 6-BA<br>(mg/L) | NAA<br>(mg/L) | Sucrose (g/L) |                              |
| CIM1                    | WPM          | 0.8            | 0.1           | 30            | 47.67 ± 3.67 bcd             |
| CIM2                    | WPM          | 0.8            | 0.2           | 30            | 63.00 ± 4.00 ab              |
| CIM3                    | WPM          | 0.8            | 0.5           | 30            | 70.33 ± 3.33 a               |
| CIM4                    | WPM          | 1.0            | 0.1           | 30            | 22.00 ± 6.35 f               |
| CIM5                    | WPM          | 1.0            | 0.2           | 30            | 44.00 ± 6.35 cde             |
| CIM6                    | WPM          | 1.0            | 0.5           | 30            | 51.67 ± 7.67 bc              |
| CIM7                    | WPM          | 1.5            | 0.1           | 30            | 29.33 ± 3.67 ef              |
| CIM8                    | WPM          | 1.5            | 0.2           | 30            | 29.33 ± 3.67 ef              |
| CIM9                    | WPM          | 1.5            | 0.5           | 30            | 33.00 ± 6.35 def             |

WPM, wood plant medium; 6-BA, 6-Benzylaminopurine; NAA, Naphthylacetic acid; the callus induction mediums (CIMs) were gelled with 3 g/L gelrite, pH 5.8-6.0. Thirty leaf explants were inoculated per CIM, repeated 3 times. Data was calculated by SPSS software. Different lowercase letters indicate significant differences at  $p < 0.05$
