# Supplementary material for: Novel R2R3-MYB Transcription Factor LiMYB75 Enhances Leaf Callus Regeneration Efficiency in Lagerstroemia indica
Source: MDPI journal article supplement (doi:10.3390/f14030517), 2023-03-06
Supplement: s1 [file s1]

**Supplementary Table S8** The junction reads obtained by next generation sequencing in the genome of transgenic and wild-type *L.indica*

| plant | Position (s) in the reference genome | gDNA flanking the insert | Inserted T-DNA: position (s) in T-DNA vector | Estimated insert size (bp) |
|-------|--------------------------------------|--------------------------|----------------------------------------------|----------------------------|
| WT    | --                                   | --                       | --                                           | --                         |
| #OE1  | 7,591,779                            | Left side                | LB: 1-145                                    | At least 6,165             |
| #OE1  | 16,384,307                           | Right side               | RB: 6,042-6,165                              | At least 6,165             |
| #OE2  | 8,786,870                            | Right side               | LB: 5,995-6,165                              | At least 6,165             |

-- means that no junction read was detected in the wild-type genome.
