# Supplementary material for: Novel R2R3-MYB Transcription Factor LiMYB75 Enhances Leaf Callus Regeneration Efficiency in Lagerstroemia indica
Source: MDPI journal article supplement (doi:10.3390/f14030517), 2023-03-06
Supplement: s1 [file s1]

**Supplementary Table S3** The effect of *Agrobacterium* concentration.

| Effect factors                 |                                                                     |                       |                        | Transformation<br>frequency (%) | Positive rate (%) |
|--------------------------------|---------------------------------------------------------------------|-----------------------|------------------------|---------------------------------|-------------------|
| <i>Agrobacterium</i><br>strain | OD <sub>600</sub> value of<br><i>Agrobacterium</i><br>resuspensions | Infection<br>duration | Co-cultivation<br>time |                                 |                   |
| EHA105                         | 0.6                                                                 | 15 min                | 48 h                   | 9.38±2.05                       | 83.33±3.33        |
| EHA105                         | 0.8                                                                 | 15 min                | 48 h                   | 37.71±6.77                      | 90.00±5.78        |
| EHA105                         | 1.0                                                                 | 15 min                | 48 h                   | 24.4±2.60                       | 86.67±3.33        |

Ten transformed leaf explants were inoculated on CIM3 and then on CRM1, and repeated three times. Data were mean ± standard deviation
