# Supplementary material for: Novel R2R3-MYB Transcription Factor LiMYB75 Enhances Leaf Callus Regeneration Efficiency in Lagerstroemia indica
Source: MDPI journal article supplement (doi:10.3390/f14030517), 2023-03-06
Supplement: s1 [file s1]

Archive with 13 entries (13 files):
- Figure  S1.tif
- Figure  S2.tif
- Figure  S3.tif
- Figure  S4.tif
- supplementary figure caption.pdf
- Table S1.pdf
- Table S2.pdf
- Table S3.pdf
- Table S4.pdf
- Table S5.pdf
- Table s6.pdf
- Table S7.pdf
- Table S8.pdf
