# Supplementary material for: Novel R2R3-MYB Transcription Factor LiMYB75 Enhances Leaf Callus Regeneration Efficiency in Lagerstroemia indica
Source: MDPI journal article supplement (doi:10.3390/f14030517), 2023-03-06
Supplement: s1 [file s1]

**Supplementary Table S2** Composition of medium tested for differentiation and regeneration from calli of *Lagerstroemia indica*.

| Callus<br>regeneration<br>medium | Components   |                |               |               |                     | The number of<br>regeneration calli | callus regeneration<br>rate (%) |
|----------------------------------|--------------|----------------|---------------|---------------|---------------------|-------------------------------------|---------------------------------|
|                                  | Basic medium | 6-BA<br>(mg/L) | NAA<br>(mg/L) | Sucrose (g/L) | The number of calli |                                     |                                 |
| CRM1                             | WPM          | 1.0            | 0.10          | 30            | 12                  | 5.33 ± 0.67                         | 44.33 ± 5.67 a                  |
| CRM2                             | WPM          | 1.0            | 0.25          | 30            | 12                  | 4.67 ± 0.33                         | 39.00 ± 3.00 ab                 |
| CRM3                             | WPM          | 1.0            | 0.40          | 30            | 12                  | 3.67 ± 0.33                         | 30.33 ± 2.67 bcd                |
| CRM4                             | WPM          | 1.5            | 0.10          | 30            | 12                  | 4.00 ± 0.57                         | 33.33 ± 4.91 abc                |
| CRM5                             | WPM          | 1.5            | 0.25          | 30            | 12                  | 3.33 ± 0.33                         | 27.67 ± 2.67 bcd                |
| CRM6                             | WPM          | 1.5            | 0.40          | 30            | 12                  | 3.00 ± 0.57                         | 25.00 ± 4.61 cd                 |
| CRM7                             | WPM          | 2.0            | 0.10          | 30            | 12                  | 3.00 ± 0.57                         | 25.00 ± 4.61 cd                 |
| CRM8                             | WPM          | 2.0            | 0.25          | 30            | 12                  | 2.67 ± 0.33                         | 22.33 ± 2.67 cd                 |
| CRM9                             | WPM          | 2.0            | 0.40          | 30            | 12                  | 2.00 ± 0.57                         | 16.67 ± 4.91 d                  |

WPM, wood plant medium; 6-BA, 6-Benzylaminopurine; NAA, Naphthylacetic acid; the callus regeneration mediums (CRMs) were gelled with 3 g/L gelrite, pH 5.8-6.0. Twelve calli were inoculated per CRM, repeated 3 times. Data was calculated by SPSS software. Different lowercase letters indicate significant differences at  $p < 0.05$
