# Supplementary material for: Novel R2R3-MYB Transcription Factor LiMYB75 Enhances Leaf Callus Regeneration Efficiency in Lagerstroemia indica
Source: MDPI journal article supplement (doi:10.3390/f14030517), 2023-03-06
Supplement: s1 [file s1 › supplementary figure caption.pdf]

Figure S1 Fluorescence efficiency of leaf explants after *Agrobacterium* infection.

Leaf explants were infiltrated with the vector 35S::LiMYB75 at OD<sub>600</sub> =0.6 (a), OD<sub>600</sub> =0.8 (b), and OD<sub>600</sub> =1.0 (c), respectively. Scale bar =1 cm. (d) Analysis of mean fluorescence intensity with ImageJ. Results are presented as means and standard deviation from three independent experiments, each with ten leaf explants. (e) Expression pattern of the *eGFP* gene. The 2<sup>-ΔCt</sup> method was used to evaluate quantitative variation between replicates. The real-time quantitative polymerase chain reaction data were normalized using the internal control expression of *LiEfa*. Different lowercase letters indicate significant differences at  $p < 0.05$ .

Figure S2 Secondary structure prediction of *Lagerstroemia indica* MYB75.

Figure S3 The development stages of leaf callus induction and regeneration in *Lagerstroemia indica*. (a) Callus activation (0 days after cutting, DAC), (b) Callus formation (5 DAC), (c) Callus expansion (10 DAC), and (d) shoot regeneration (35 DAC). Scale bar =1 cm

Figure S4 Phenotype analysis of wild type and LiMYB75-overexpression plants. Scale bar =1 cm
