# Supplementary material for: Novel R2R3-MYB Transcription Factor LiMYB75 Enhances Leaf Callus Regeneration Efficiency in Lagerstroemia indica
Source: MDPI journal article supplement (doi:10.3390/f14030517), 2023-03-06
Supplement: s1 [file s1 › Table s6.pdf]

**Supplementary Table S6** Primer sequences

| Primer name   | Gene ID            | Homologous<br><i>Arabidopsis</i> | Sequence (5'-3')                                   | Note            |
|---------------|--------------------|----------------------------------|----------------------------------------------------|-----------------|
| MYB75-C-F     | <i>Lind22G0116</i> | --                               | TGGAAGGCTGGATGAGAG                                 | Kpn I<br>BamH I |
| MYB75-C-R     |                    |                                  | TGGGATACGGAACAGGGAC                                |                 |
| pBIN75-R-F    | <i>Lind22G0116</i> | --                               | ATTACGAACGATAG <b>GGTACC</b> ATGAAAGATGGTGTTTTAAA  |                 |
| pBIN75-R-R    |                    |                                  | GCCCTTGCTCACCAT <b>GGATCC</b> GTCTATCTCAGGCAGGAAAT |                 |
| qPCR-75-F     | <i>Lind22G0116</i> | --                               | CCAGGAAGTGCCTCGGGTTGGACTCT                         |                 |
| qPCR-75-R     |                    |                                  | GGACCATCCATGTCATCGCCACCAGC                         |                 |
| eGFP detect-F | --                 | --                               | AGTGCTTCAGCCGCTACCCC                               |                 |
| eGFP detect-R | --                 | --                               | CCATGCCGAGAGTGATCCCG-3                             |                 |
| qPCR-eGFP-F   | <i>Lind03G0099</i> | <i>STM</i>                       | TACAACTACAACAGCCACAA                               |                 |
| qPCR-eGFP-R   |                    |                                  | CGGATCTTGAAGTTCACCTT                               |                 |
| qPCR-099-F2   |                    |                                  | AATGGGAAGTTGCCGAAGGATGCT                           |                 |
| qPCR-099-R2   |                    |                                  | AGTGCCGCTTTCTCTGGTTGATGA                           |                 |
| qPCR-236-F1   | <i>Lind21G0236</i> | <i>TCP2</i>                      | GCAAGGCGGTGGAATGGCTGAT                             |                 |
| qPCR-236-R1   |                    |                                  | CTGCTGCTGCTGGTTGTTCTGGTT                           |                 |
| qPCR-744-F1   | <i>Lind04G1744</i> | <i>TCP3</i>                      | TAGGACTCAACGGCTGTA                                 |                 |
| qPCR-744-R1   |                    |                                  | TGAAAGGCTGCTGAAGTG                                 |                 |
| qPCR-007-F2   | <i>Lind20G0007</i> | <i>TCP4</i>                      | TCCTCTGCCGCCGACGACTATGC                            |                 |
| qPCR-007-R2   |                    |                                  | CGCCACCGCCTCTGCTCCTCAC                             |                 |
| qPCR-847-F1   | <i>Lind21G0847</i> | <i>TCP4</i>                      | TCACCACCACCAGCAGAGCCAATC                           |                 |
| qPCR-847-R1   |                    |                                  | GCCGCCGCTGTATCGTTGTTG                              |                 |
| qPCR-132-F2   | <i>Lind00G0132</i> | <i>ARR12</i>                     | GCAAAGTCACTCCCAGCACTCAGG                           |                 |
| qPCR-132-R2   |                    |                                  | GGGTCCACAGCAGCAATCTCTCC                            |                 |

|             |                    |              |                         |
|-------------|--------------------|--------------|-------------------------|
| qPCR-772-F1 | <i>Lind01G1772</i> | <i>ARR1</i>  | CCAGGACCTCAGGGCAACTCTAT |
| qPCR-772-R1 |                    |              | TCTCCCATTCTCAGCAGGCATGT |
| qPCR-862-F2 | <i>Lind12G0862</i> | <i>LBD18</i> | GCCTCTCTCCATTGCCGACCTC  |
| qPCR-862-F2 |                    |              | CTTGAAGATCGCTGCTGCCTCCT |

---
