# Supplementary material for: Novel R2R3-MYB Transcription Factor LiMYB75 Enhances Leaf Callus Regeneration Efficiency in Lagerstroemia indica
Source: MDPI journal article supplement (doi:10.3390/f14030517), 2023-03-06
Supplement: s1 [file s1 › Table S7.pdf]

**Supplementary Table S7** The summary of sequence data from next generation sequencing

| Sample | Clean reads | Clean bases (bp) | Depth | GC (%) | Q30 (%) |
|--------|-------------|------------------|-------|--------|---------|
| WT     | 89,549,710  | 13,432,456,500   | 36.21 | 42.32  | 89.48   |
| #OE1   | 86,511,182  | 12,976,677,300   | 34.98 | 42.22  | 90.87   |
| #OE2   | 82,431,856  | 12,364,778,400   | 33.33 | 42.24  | 90.21   |
