# Supplementary figures and images for: Novel R2R3-MYB Transcription Factor LiMYB75 Enhances Leaf Callus Regeneration Efficiency in Lagerstroemia indica
Source: MDPI journal article supplement (doi:10.3390/f14030517), 2023-03-06

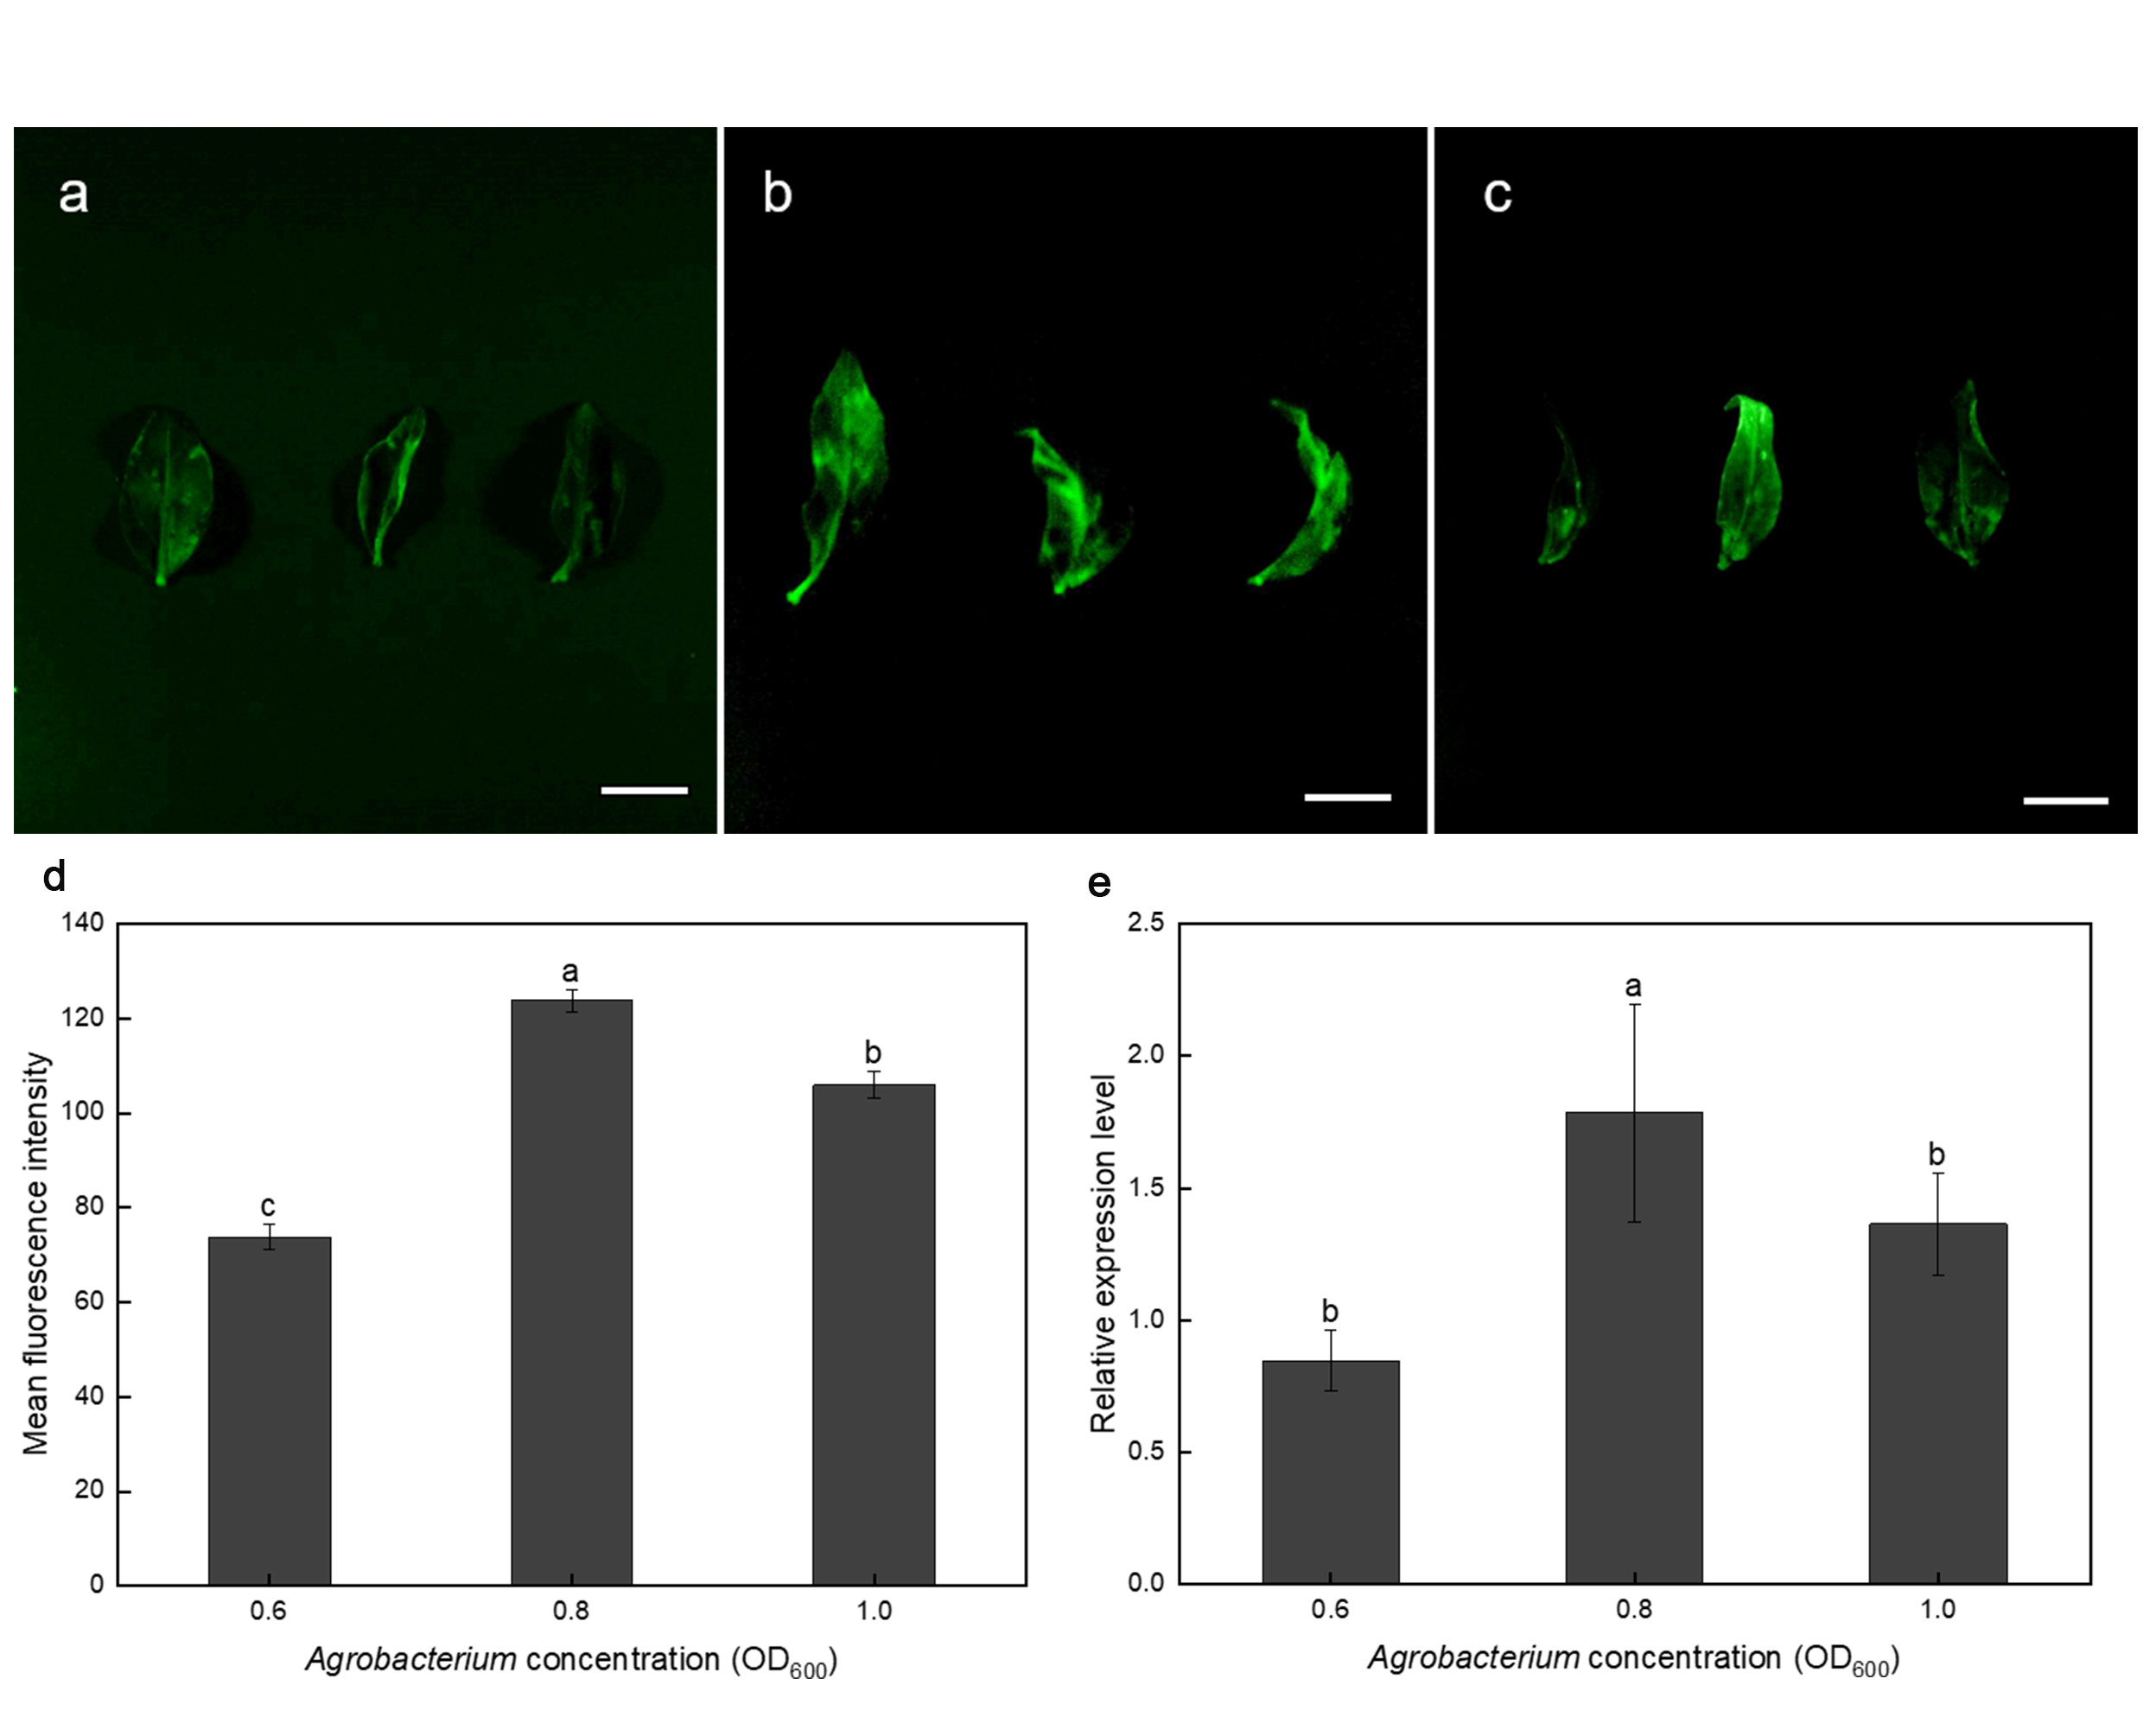

Supplement: s1 [file s1 › Figure S1.tif]

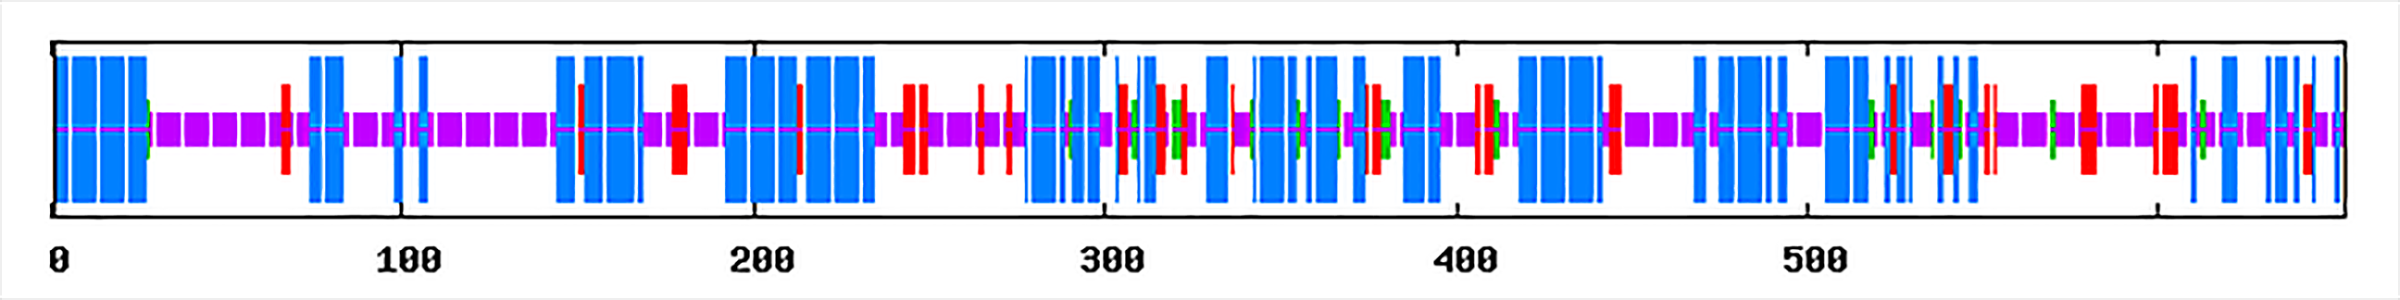

Supplement: s1 [file s1 › Figure S2.tif]

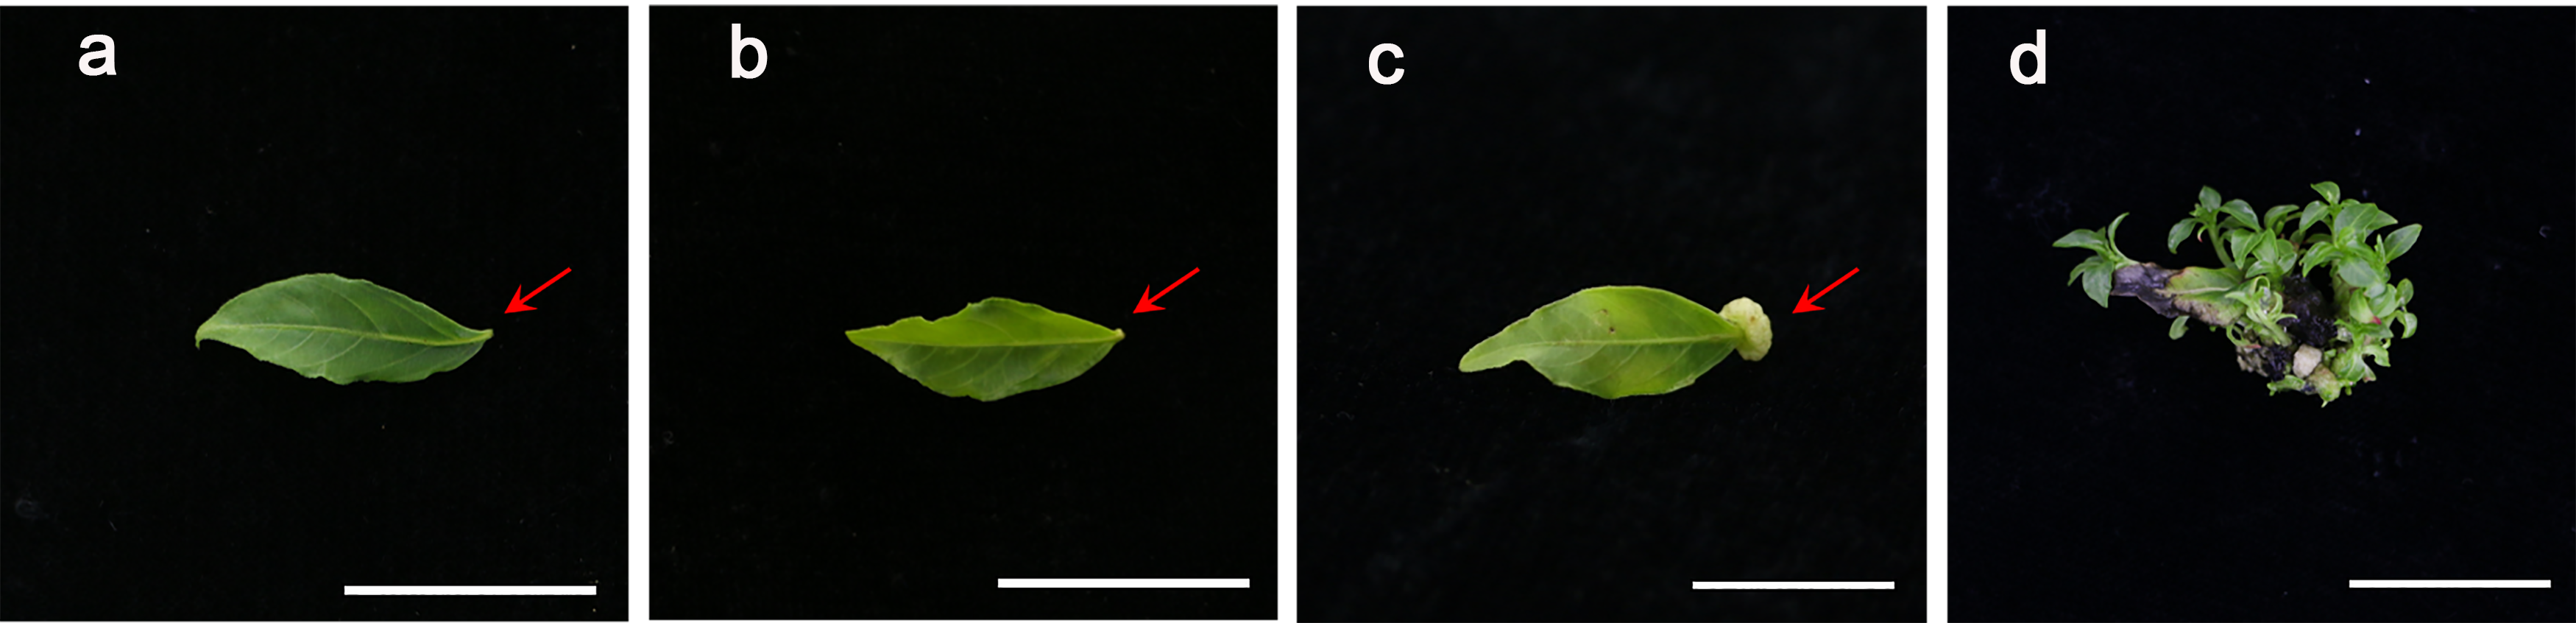

Supplement: s1 [file s1 › Figure S3.tif]

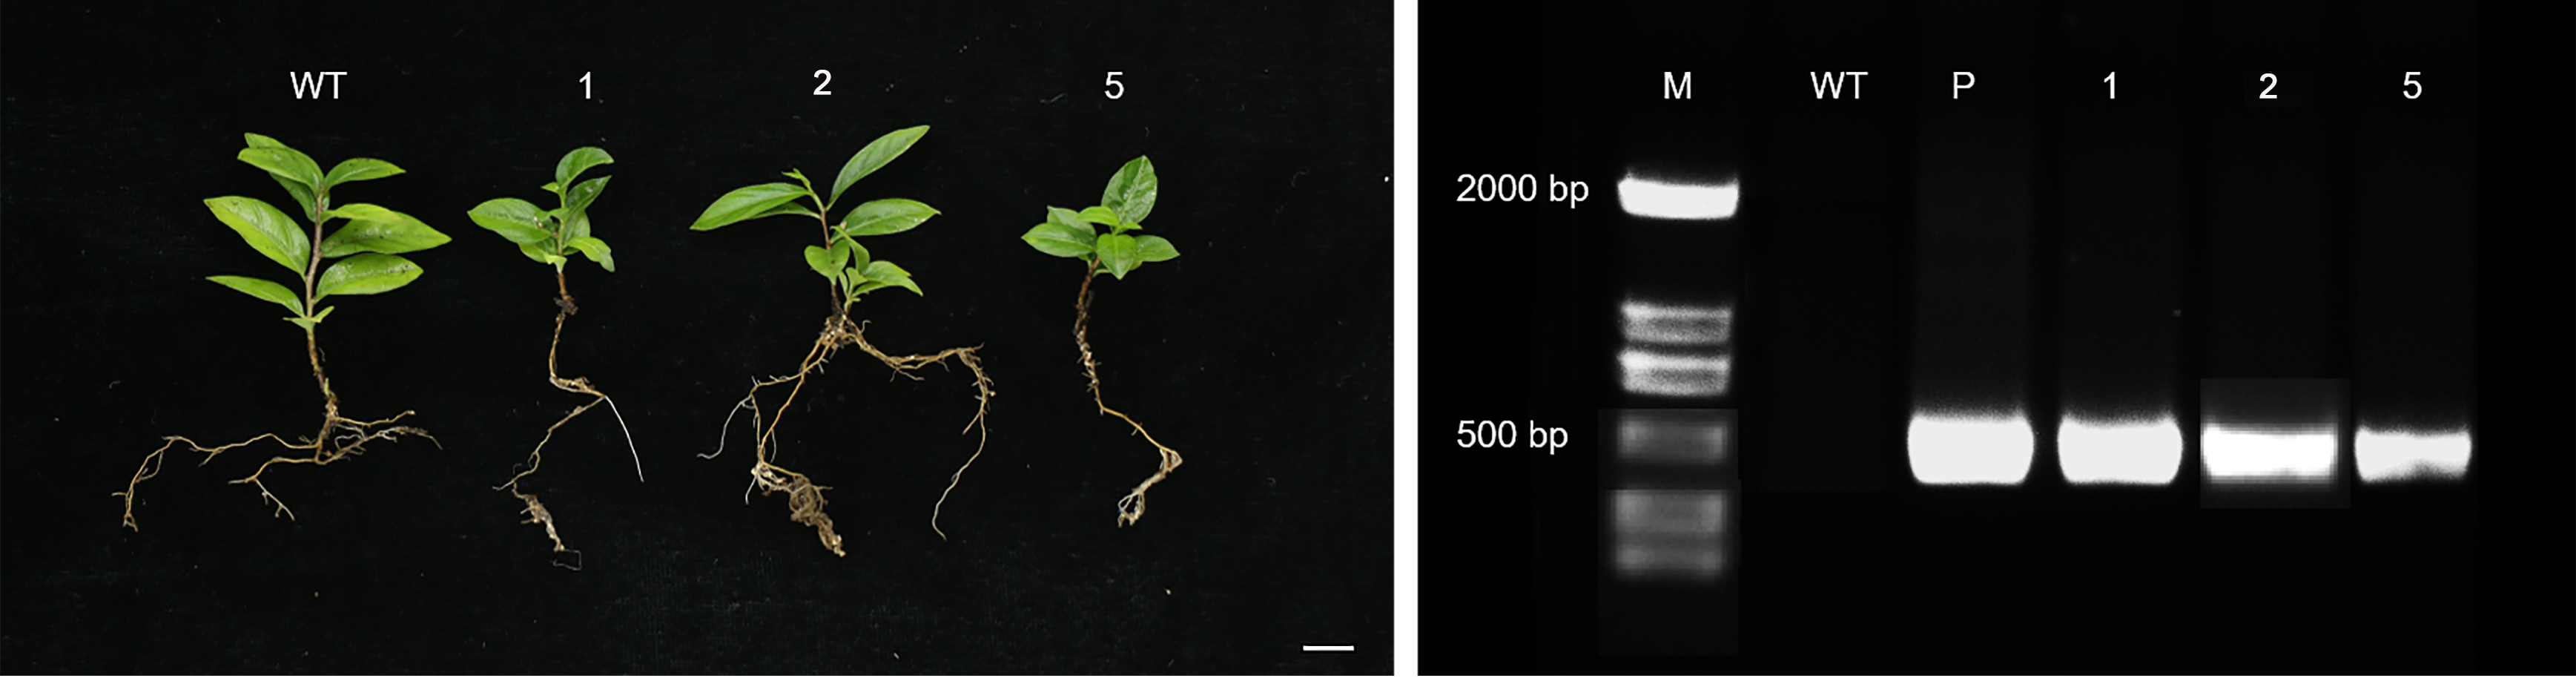

Supplement: s1 [file s1 › Figure S4.tif]
